# Supplementary material
Source: PubMed Central journal article supplement (PMC4904151)
Supplement: NIHMS792151-supplement-supplement_1.pdf [file NIHMS792151-supplement-supplement_1.pdf]

**Supplementary Table 1. PCR primers utilized for single cell IgH and IgL amplification.**

| PCR Round                       | Primer name                     | 5'-3' sequence                  | Reference                       |
|---------------------------------|---------------------------------|---------------------------------|---------------------------------|
| <b>IgH 1<sup>st</sup> round</b> | 5' MsVHE                        | GGGAATTCGAGGTGCAGCTGCAGGAGTCTGG | (Seidl, MacKenzie et al. 1997)  |
|                                 | 3' IgG1_outter                  | GGATGACTCATCCCAGGGTCACCATGGAGT  | (Seidl, MacKenzie et al. 1997)  |
| <b>IgK 1<sup>st</sup> round</b> | 5'L-V $\kappa$ _3               | TGCTGCTGCTCTGGGTTCCAG           | (Tiller, Busse et al. 2009)     |
|                                 | 5'L-V $\kappa$ _4               | ATTWTCAGCTTCCTGCTAATC           | (Tiller, Busse et al. 2009)     |
|                                 | 5'L-V $\kappa$ _5               | TTTTGCTTTTCTGGATTYCAG           | (Tiller, Busse et al. 2009)     |
|                                 | 5'L-V $\kappa$ _6               | TCGTGTTKCTSTGGTTGTCTG           | (Tiller, Busse et al. 2009)     |
|                                 | 5'L-V $\kappa$ _6,8,9           | ATGGAATCACAGRCYCWGGT            | (Tiller, Busse et al. 2009)     |
|                                 | 5'L-V $\kappa$ _14              | TCTTGTGCTCTGGTTYCCAG            | (Tiller, Busse et al. 2009)     |
|                                 | 5'L-V $\kappa$ _19              | CAGTTCCTGGGGCTCTTGTTGTTC        | (Tiller, Busse et al. 2009)     |
|                                 | 5'L-V $\kappa$ _20              | CTCACTAGCTCTTCTCCTC             | (Tiller, Busse et al. 2009)     |
|                                 | 3'mC $\kappa$ _outter           | GATGGTGGGAAGATGGATACAGTT        | (Tiller, Busse et al. 2009)     |
|                                 | <b>IgH 2<sup>nd</sup> round</b> | 5' MsVHE                        | GGGAATTCGAGGTGCAGCTGCAGGAGTCTGG |
| 3-IgG1_inner                    |                                 | CCAGGGGCCAGTGGATAGAC            | (Seidl, MacKenzie et al. 1997)  |
| <b>IgK 2<sup>nd</sup> round</b> | 5'mV $\kappa$ appa              | GAYATTGTGMTSACMCARWCTMCA        | (Tiller, Busse et al. 2009)     |
|                                 | 3'BsiWI_P-mJK01                 | GCCACCGTACGTTTGATTTCCAGCTTGGTG  | (Tiller, Busse et al. 2009)     |
|                                 | 3'BsiWI_P-mJK02                 | GCCACCGTACGTTTTATTTCCAGCTTGGTC  | (Tiller, Busse et al. 2009)     |
|                                 | 3'BsiWI_P-mJK03                 | GCCACCGTACGTTTTATTTCCAACCTTTGTC | (Tiller, Busse et al. 2009)     |
|                                 | 3'BsiWI_P-mJK04                 | GCCACCGTACGTTTCAGCTCCAGCTTGGTC  | (Tiller, Busse et al. 2009)     |

Seidl, K. J., J. D. MacKenzie, D. Wang, A. B. Kantor, E. A. Kabat, L. A. Herzenberg and L. A. Herzenberg (1997). "Frequent occurrence of identical heavy and light chain Ig rearrangements." *Int Immunol* **9**(5): 689-702.

Tiller, T., C. E. Busse and H. Wardemann (2009). "Cloning and expression of murine Ig genes from single B cells." *Journal of Immunological Methods* **350**(1-2): 183-193.
